# Supplementary material for: Comparing Types of Yoga for Chronic Low Back and Neck Pain in Military Personnel: A Feasibility Randomized Controlled Trial
Source: PubMed Central journal article supplement (PMC9208032; doi:10.1177/2164957x221094596), 2022-06-16
Supplement: sj-pdf-1-gam-10.1177_2164957X221094596.pdf [file sj-pdf-1-gam-10.1177_2164957X221094596.pdf]

**Supplemental Table 1. Inclusion / Exclusion Criteria and Method used to Determine Eligibility for Study Participation**

| <b>Inclusion Criteria</b>                                         | <b>Determined by:</b>                 | <b>Exclusion Criteria</b>                                             | <b>Determined by:</b>               |
|-------------------------------------------------------------------|---------------------------------------|-----------------------------------------------------------------------|-------------------------------------|
| Active-duty military employment and age $\geq$ 18                 | screening interview; medical record   | back or neck surgery in the last 1 year                               | screening interview; medical record |
| Diagnosis of chronic LBP or neck pain > 6 months                  | screening interview; medical record   | chronic pain due to specific systemic problem (e.g., lupus)           | screening interview; medical record |
| Willing to attend 12 weeks of yoga                                | screening interview; informed consent | severe vertebral disk problems                                        | screening interview; medical record |
| Willing to complete 2 assessments                                 | screening interview; informed consent | persistent sciatica or nerve compression > 3 months                   | screening interview; medical record |
| English Literacy                                                  | screening interview; informed consent | coexisting chronic pain (migraines, fibromyalgia)                     | screening interview; medical record |
| No changes in pain treatments in the past month.                  | medical record; screening interview   | Serious or unstable psychiatric illness (e.g. psychosis, mania)       | screening interview; medical record |
| Willing to not change pain treatments unless medically necessary. | screening interview; informed consent | major coexisting medical illness (e.g., cancer, COPD, morbid obesity) | screening interview; medical record |
| Have not practiced yoga > 2x in the last 12 months                | screening interview; informed consent | Positive Romberg test (with or without sensory neuropathy)            | screening interview; medical record |

**Supplemental Table 2 - Health Outcomes by Location of Pain and attended at least 50% of classes**

| <b>Outcome</b> | <b>Back pain only (n=12)</b><br>Mean change (95% CI) | <b>Neck pain (n=14)</b><br>Mean change (95% CI) |
|----------------|------------------------------------------------------|-------------------------------------------------|
| RMDQ           | -3.75 (-6.45; -1.05)<br>(d=0.88)                     | -2.14 (-4.22; -0.07)<br>(d=0.60)                |
| NDI            | -1.75 (-6.33; 2.83)<br>(d=0.24)                      | -1.50 (-4.62; 1.62)<br>(d=0.28)                 |
| BPI-PS         | -1.56 (-2.67; -0.45)<br>(d=0.89)                     | -0.6 (-1.67; 0.50)<br>(d=0.31)                  |

|                      |                                  |                                 |
|----------------------|----------------------------------|---------------------------------|
| BPI -PI              | -0.96 (-1.92; -0.01)<br>(d=0.64) | -0.40 (-1.54; 0.75)<br>(d=0.20) |
| PROMIS-PI            | -1.00 (-1.77; -0.23)<br>(d=0.83) | -0.57 (-1.96; 0.82)<br>(d=0.24) |
| SF12-PH              | 4.84 (0.87; 8.81)<br>(d=0.78)    | 2.11 (-2.90; 7.11)<br>(d=0.24)  |
| SF12-MH              | 1.00 (-3.71; 5.70)<br>(d=0.14)   | 1.75 (-4.64; 8.13)<br>(d=0.16)  |
| FSS                  | 0.03 (-0.69; 0.74)<br>(d= -0.03) | 0.73 (-1.53; 0.07)<br>(d=0.53)  |
| Mean effect size - d | <b>0.55</b>                      | <b>0.32</b>                     |
| Sessions attended    | 10.2                             | 10.4                            |

**Supplemental Table 3 – Health Outcomes for Participants with chronic Neck Pain by Type of Yoga (intent to treat)**

| Neck Pain | Hatha (n=11)                       | Restorative(n=10)                 |
|-----------|------------------------------------|-----------------------------------|
|           | Mean change (95% CI)               | Mean change (95% CI)              |
| RMDQ      | 1.4 (-2.80; 5.53)<br>(d= -0.22)    | -2.10 (-4.99; 0.79)<br>(d=0.52)   |
| NDI       | -0.64 (-4.20; 2.92)<br>(d=0.12)    | -1.0 (-5.29; 3.29)<br>(d=0.17)    |
| BPI-PS    | -0.14 (-1.47; 1.20)<br>(=0.07)     | -0.50 (-2.02; 1.02)<br>(d=0.24)   |
| BPI-PI    | 0.18 (-1.30; 1.66)<br>(d= -.08)    | -0.4 (-1.89; 1.04)<br>(d=0.21)    |
| PROMIS-PI | -0.36 (-1.17; 0.45)<br>(d=0.30)    | -0.50 (-2.45; 1.45)<br>(d=0.18)   |
| SF12-PH   | 1.66 (-0.99; 4.30)<br>(d=0.42)     | 1.91 (-5.29; 9.10)<br>(d=0.19)    |
| SF12-MH   | -3.43 (-11.83; 4.97)<br>(d= 0-.27) | -0.35 (-7.91; 7.21)<br>(d= -0.03) |
| FSS       | 0.78 (-0.27; 1.83)<br>(d= -0.50)   | -0.74 (-1.92; 0.43)<br>(d=0.45)   |

|                      |              |             |
|----------------------|--------------|-------------|
| Mean effect size - d | <b>-0.02</b> | <b>0.24</b> |
| Sessions attended    | 6.1          | 7.8         |

RMDQ=Roland-Morris Disability Questionnaire; NDI=Neck Disability Index; BPI-PS= Brief Pain Inventory-Pain Severity; BPI-PI= Brief Pain Inventory-Pain Interference; PROMIS-PI = PROMIS-Pain Intensity; SF-12-PH= Short-form Health Survey- Physical Health; SF-12-MH= Short-form Health Survey-Mental Health; FSS= Fatigue Severity Scale.

**Supplemental Table 4 - Health Outcomes for Participants with chronic Neck Pain by Type of Yoga (per protocol)**

| Neck Pain            | Hatha (n=5)                     | Restorative(n=9)                 |
|----------------------|---------------------------------|----------------------------------|
|                      | Mean change (95% CI)            | Mean change (95% CI)             |
| RMDQ                 | -1.2 (-5.26; 2.86)<br>(d=0.37)  | -2.67 (-5.62; 0.29)<br>(d=0.69)  |
| NDI                  | -2.8 (-7.05; 1.45)<br>(d=0.82)  | -0.78 (-5.64; 4.08)<br>(d=0.12)  |
| BPI-PS               | -0.75 (-2.16; 0.66)<br>(d=0.66) | -0.50 (-2.22; 1.23)<br>(d=0.22)  |
| BPI-PI               | -0.54 (-2.91; 1.82)<br>(d=0.29) | -0.32 (-1.96; 1.33)<br>(d=0.15)  |
| PROMIS-PI            | -0.60 (-2.48; 1.28)<br>(d=0.40) | -0.56 (-2.77; 1.66)<br>(d=0.19)  |
| SF12-PH              | 2.36 (-2.70; 7.44)<br>(d=0.58)  | 1.97 (-6.23; 10.16)<br>(d=0.18)  |
| SF12-MH              | 5.21 (-8.56; 18.97)<br>(d=0.47) | -0.18 (-8.78; 8.43)<br>(d=-0.02) |
| FSS                  | -0.33 (-1.43; 0.77)<br>(d=0.38) | -0.95 (-2.18; 0.28)<br>(d=0.59)  |
| Mean effect size - d | <b>0.50</b>                     | <b>0.27</b>                      |
| Sessions attended    | 10.8                            | 10.1                             |

RMDQ=Roland-Morris Disability Questionnaire; NDI=Neck Disability Index; BPI-PS= Brief Pain Inventory-Pain Severity; BPI-PI= Brief Pain Inventory-Pain Interference; PROMIS-PI = PROMIS-Pain Intensity; SF-12-PH= Short-

form Health Survey- Physical Health; SF-12-MH= Short-form Health Survey-Mental Health; FSS= Fatigue Severity

| Outcome          | Hatha Yoga (n=21) |           |                             | Restorative Yoga (n=21) |            |                             |
|------------------|-------------------|-----------|-----------------------------|-------------------------|------------|-----------------------------|
|                  | (Week 0)          | (Week 12) | Mean difference<br>(95% CI) | (Week 0)                | (Week 12)  | Mean difference<br>(95% CI) |
| Self-Efficacy    | 5.7 (2.0)         | 5.3 (2.4) | -.39<br>(-1.49; 0.71)       | 5.9 (2.1)               | 6.0 (2.6)  | 0.33<br>(-0.98; 1.05)       |
| AUDIT-C          | 2.2 (1.8)         | 1.9 (1.8) | -0.29<br>(-0.72; 0.15)      | 2.1 (1.6)               | 2.3 (1.5)  | 0.24<br>(-0.19; 0.67)       |
| Resilience (BRS) | 3.6 (0.8)         | 3.6 (0.7) | 0.03                        | 4.0 (0.8)               | 3.98 (0.9) | -0.02                       |

Scale.

|                                     |                          |              |                         |                                |              |                        |
|-------------------------------------|--------------------------|--------------|-------------------------|--------------------------------|--------------|------------------------|
|                                     |                          |              | (-0.26; 0.32)           |                                |              | (-0.30; 0.25)          |
| <b>Depression (CESD 10)</b>         | 10.7 (5.4)               | 10.6 (6.3)   | -0.05<br>(-2.34; 2.25)  | 8.7 (5.4)                      | 9.8 (5.8)    | 1.10<br>(-2.0; 4.19)   |
| <b>Anger (DAR)</b>                  | 16.0 (13.3)              | 15.8 (15.0)  | -0.14<br>(-5.51; 5.22)  | 13.6 (10.5)                    | 14.4 (12.8)  | 0.81<br>(-3.45; 5.06)  |
|                                     | <b>Hatha Yoga (n=15)</b> |              |                         | <b>Restorative Yoga (n=20)</b> |              |                        |
| <b>Balance – right, eyes open</b>   | 51.8s (15.7)             | 54.9s (14.8) | 4.07<br>(-2.36; 10.49)  | 45.1s (20.2)                   | 49.3s (18.7) | 4.23<br>(-5.93; 14.38) |
| <b>Balance – left, eyes open</b>    | 51.5s (15.9)             | 59.9s (0.26) | 7.87<br>(-0.41; 16.14)  | 49.8s (18.6)                   | 48.1s (20.1) | -1.65<br>(-9.94; 6.64) |
| <b>Balance – right, eyes closed</b> | 20.1s (18.1)             | 26.7s (20.3) | 4.77<br>(-2.18; 11.72)  | 11.6s (12.6)                   | 18.9s (16.1) | 7.33<br>(-0.89; 15.54) |
| <b>Balance – left, eyes closed</b>  | 22.7s (19.1)             | 15.1s (14.9) | -7.60<br>(-17.47; 2.27) | 15.6s (13.7)                   | 18.5s (17.8) | 2.83<br>(-4.57; 10.22) |
| <b>Grip Strength - right</b>        | 88.8 (31.3)              | 94.6 (28.1)  | 5.83<br>(-0.84; 12.51)  | 83.5 (33.8)                    | 88.6 (24.6)  | 5.08<br>(-2.72; 12.87) |
| <b>Grip Strength - left</b>         | 82.0 (28.8)              | 86.2 (25.2)  | 4.27<br>(-1.54; 10.07)  | 81.2 (29.8)                    | 81.0 (26.8)  | -0.25<br>(-3.69; 3.19) |

Supplement Table 5 – Additional Secondary and Exploratory Outcomes

AUDIT-C=AUDIT-C 3-item; BRS=Brief Resiliency Scale; CESD 10= Center for Epidemiologic Studies Short Depression Scale 10-item; DAR= Dimensions of Anger Reactions
